# Supplementary material for: HOTSSea v1: a NEMO-based physical Hindcast of the Salish Sea (1980–2018) supporting ecosystem model development
Source: Copernicus journal article supplement (doi:10.5194/gmd-2024-58), 2024-05-22
Supplement: Supplementary file [file gmd-2024-58-AC2-supplement.pdf]

Hello,

As requested, we have revised our digital assets to comply with the GMD data and code policy. We created a new Github code repo and therefore have new Zenodo DOI's and links to provide, which are shown below.

I don't see a way to revise the assets and links using the online portal. Please let me know the best way to do so.

#####

Data sets:

Forcings 1: HRDPS

<https://zenodo.org/doi/10.5281/zenodo.12193923>

Forcings 2: RDRS

<https://zenodo.org/doi/10.5281/zenodo.12206290>

Forcings 3: ERA5, CIOPS, Runoff, etc

<https://zenodo.org/doi/10.5281/zenodo.12312768>

Note - due to storage limits, three Zenodo archives were required

#####

Model code and software:

HOTSSea\_v1\_NEMOandSupportCode

<https://doi.org/10.5281/zenodo.12520931>

which archives the following github repo:

[https://github.com/goldford/HOTSSea\\_v1\\_NEMOandSupportCode/tree/main](https://github.com/goldford/HOTSSea_v1_NEMOandSupportCode/tree/main)

with files specifically requested by the reviewer and editor here (NEMO sources):

[https://github.com/goldford/HOTSSea\\_v1\\_NEMOandSupportCode/tree/main/serverside/NEMO](https://github.com/goldford/HOTSSea_v1_NEMOandSupportCode/tree/main/serverside/NEMO)

[O](#)

#####

Interactive computing environment:

HOTSSea\_v1\_NEMOandSupportCode

<https://doi.org/10.5281/zenodo.12520931>

which archives the following github repo:

[https://github.com/goldford/HOTSSea\\_v1\\_NEMOandSupportCode/tree/main](https://github.com/goldford/HOTSSea_v1_NEMOandSupportCode/tree/main)

with python notebooks found here:

[https://github.com/goldford/HOTSSea\\_v1\\_NEMOandSupportCode/tree/main/desktop/code](https://github.com/goldford/HOTSSea_v1_NEMOandSupportCode/tree/main/desktop/code)

Note - this is in the same repo as the model code and software

Best wishes,  
Greig Oldford

-----Original Message-----

From: [editorial@copernicus.org](mailto:editorial@copernicus.org) <[editorial@copernicus.org](mailto:editorial@copernicus.org)>

Sent: Friday, June 14, 2024 3:57 AM

To: Oldford, Greig <[Greig.Oldford@dfo-mpo.gc.ca](mailto:Greig.Oldford@dfo-mpo.gc.ca)>  
Cc: [editor@mailarchive.copernicus.org](mailto:editor@mailarchive.copernicus.org)  
Subject: gmd-2024-58 - Chief editor comment posted

Dear Greig Oldford,

We are pleased to inform you that Juan Antonio Añel posted a new Chief editor comment in the interactive discussion of the following GMD preprint:

Title: HOTSSea v1: a NEMO-based physical Hindcast of the Salish Sea (1980–2018) supporting ecosystem model development

Author(s): Greig Oldford et al.

MS No.: gmd-2024-58

MS type: Model description paper

Please access the discussion at:

<https://can01.safelinks.protection.outlook.com/?url=https%3A%2F%2Fgmd.copernicus.org%2Fpreprints%2Fgmd-2024-58%2F%23discussion&data=05%7C02%7Cgreig.oldford%40dfo-mpo.gc.ca%7C2ead9324a6b460955a508dc8c60baf6%7C1594fdaea1d94405915d011467234338%7C0%7C0%7C638539594292527157%7CUnknown%7CTWFpbGZsb3d8eyJWljojMC4wLjAwMDAiLCJQIjoiV2luMzliLCJBTil6lk1haWwiLCJXVCi6Mn0%3D%7C0%7C%7C%7C&sdata=WMIJGaCYzm4DkxnmUhQIsn%2B6fJ%2FCiAdjo4upb8nT0%3D&reserved=0>

To log in, please use your Copernicus Office user ID 752190.

In case any questions arise, please do not hesitate to contact me.

Kind regards,

The editorial support team  
Copernicus Publications  
[editorial@copernicus.org](mailto:editorial@copernicus.org)

Data protection remark: emails sent from the online system CO Editor might include the email address [editor@mailarchive.copernicus.org](mailto:editor@mailarchive.copernicus.org) as CC. When replying to such emails and keeping this email address in CC, your replies will be archived in the online system CO Editor alongside the manuscript identified through the manuscript number in the subject line. Such archived emails are accessible for the respective handling editors, journal's chief editors, as well as Copernicus Publications' staff members.
