# Supplementary figures and images for: HOTSSea v1: a NEMO-based physical Hindcast of the Salish Sea (1980–2018) supporting ecosystem model development
Source: Copernicus journal article supplement (doi:10.5194/gmd-2024-58), 2024-05-22

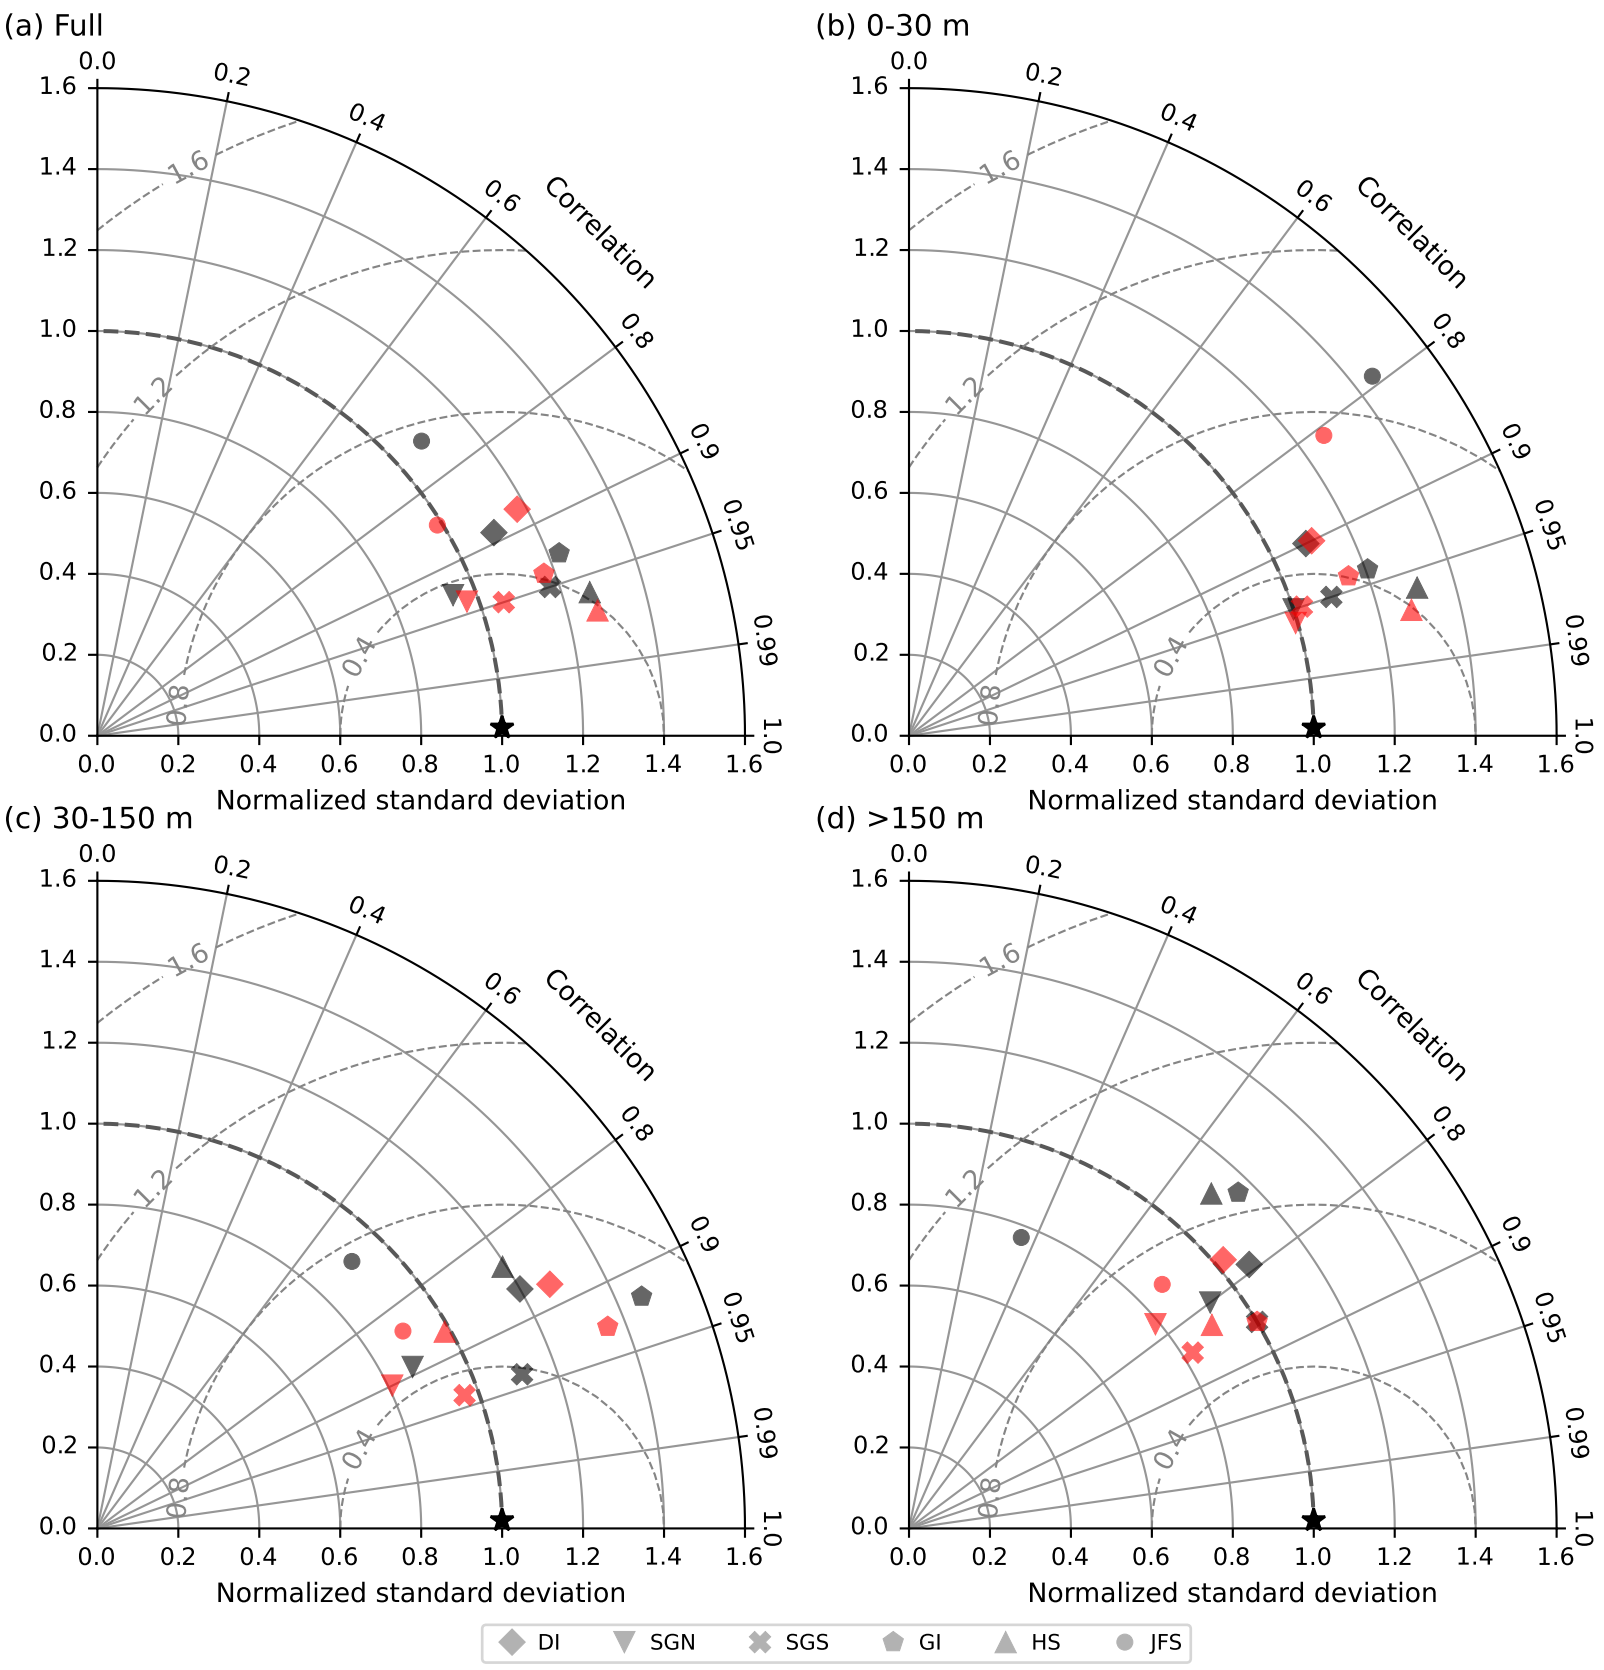

Supplement: Supplementary file 1 [file gmd-2024-58-supplement-version2.zip]

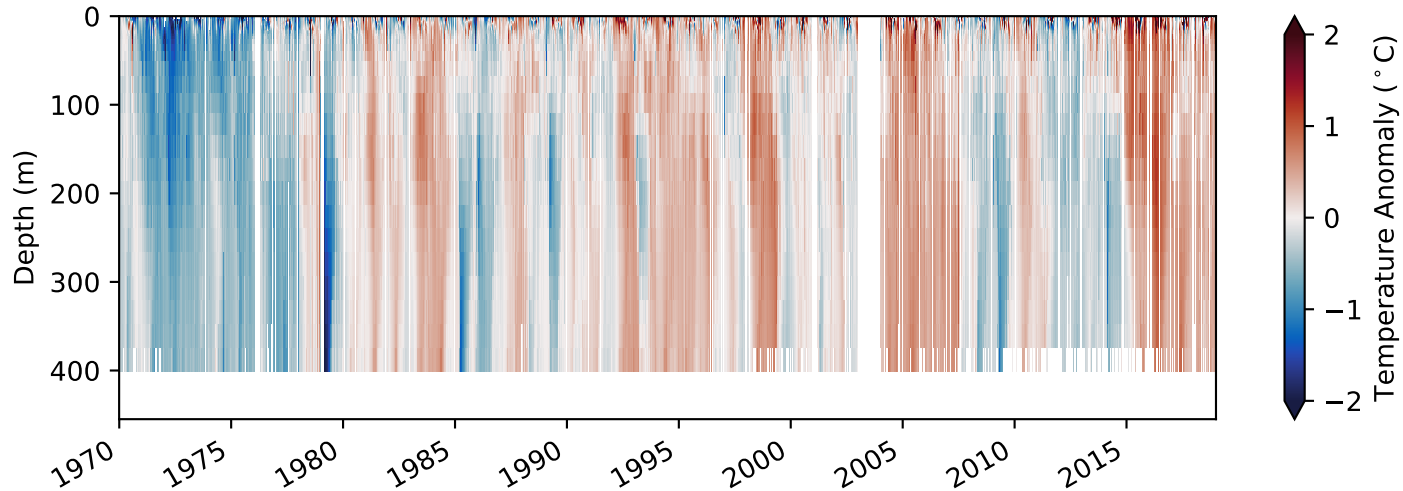

Supplement: Supplementary file 2 [file gmd-2024-58-supplement-version2.zip]

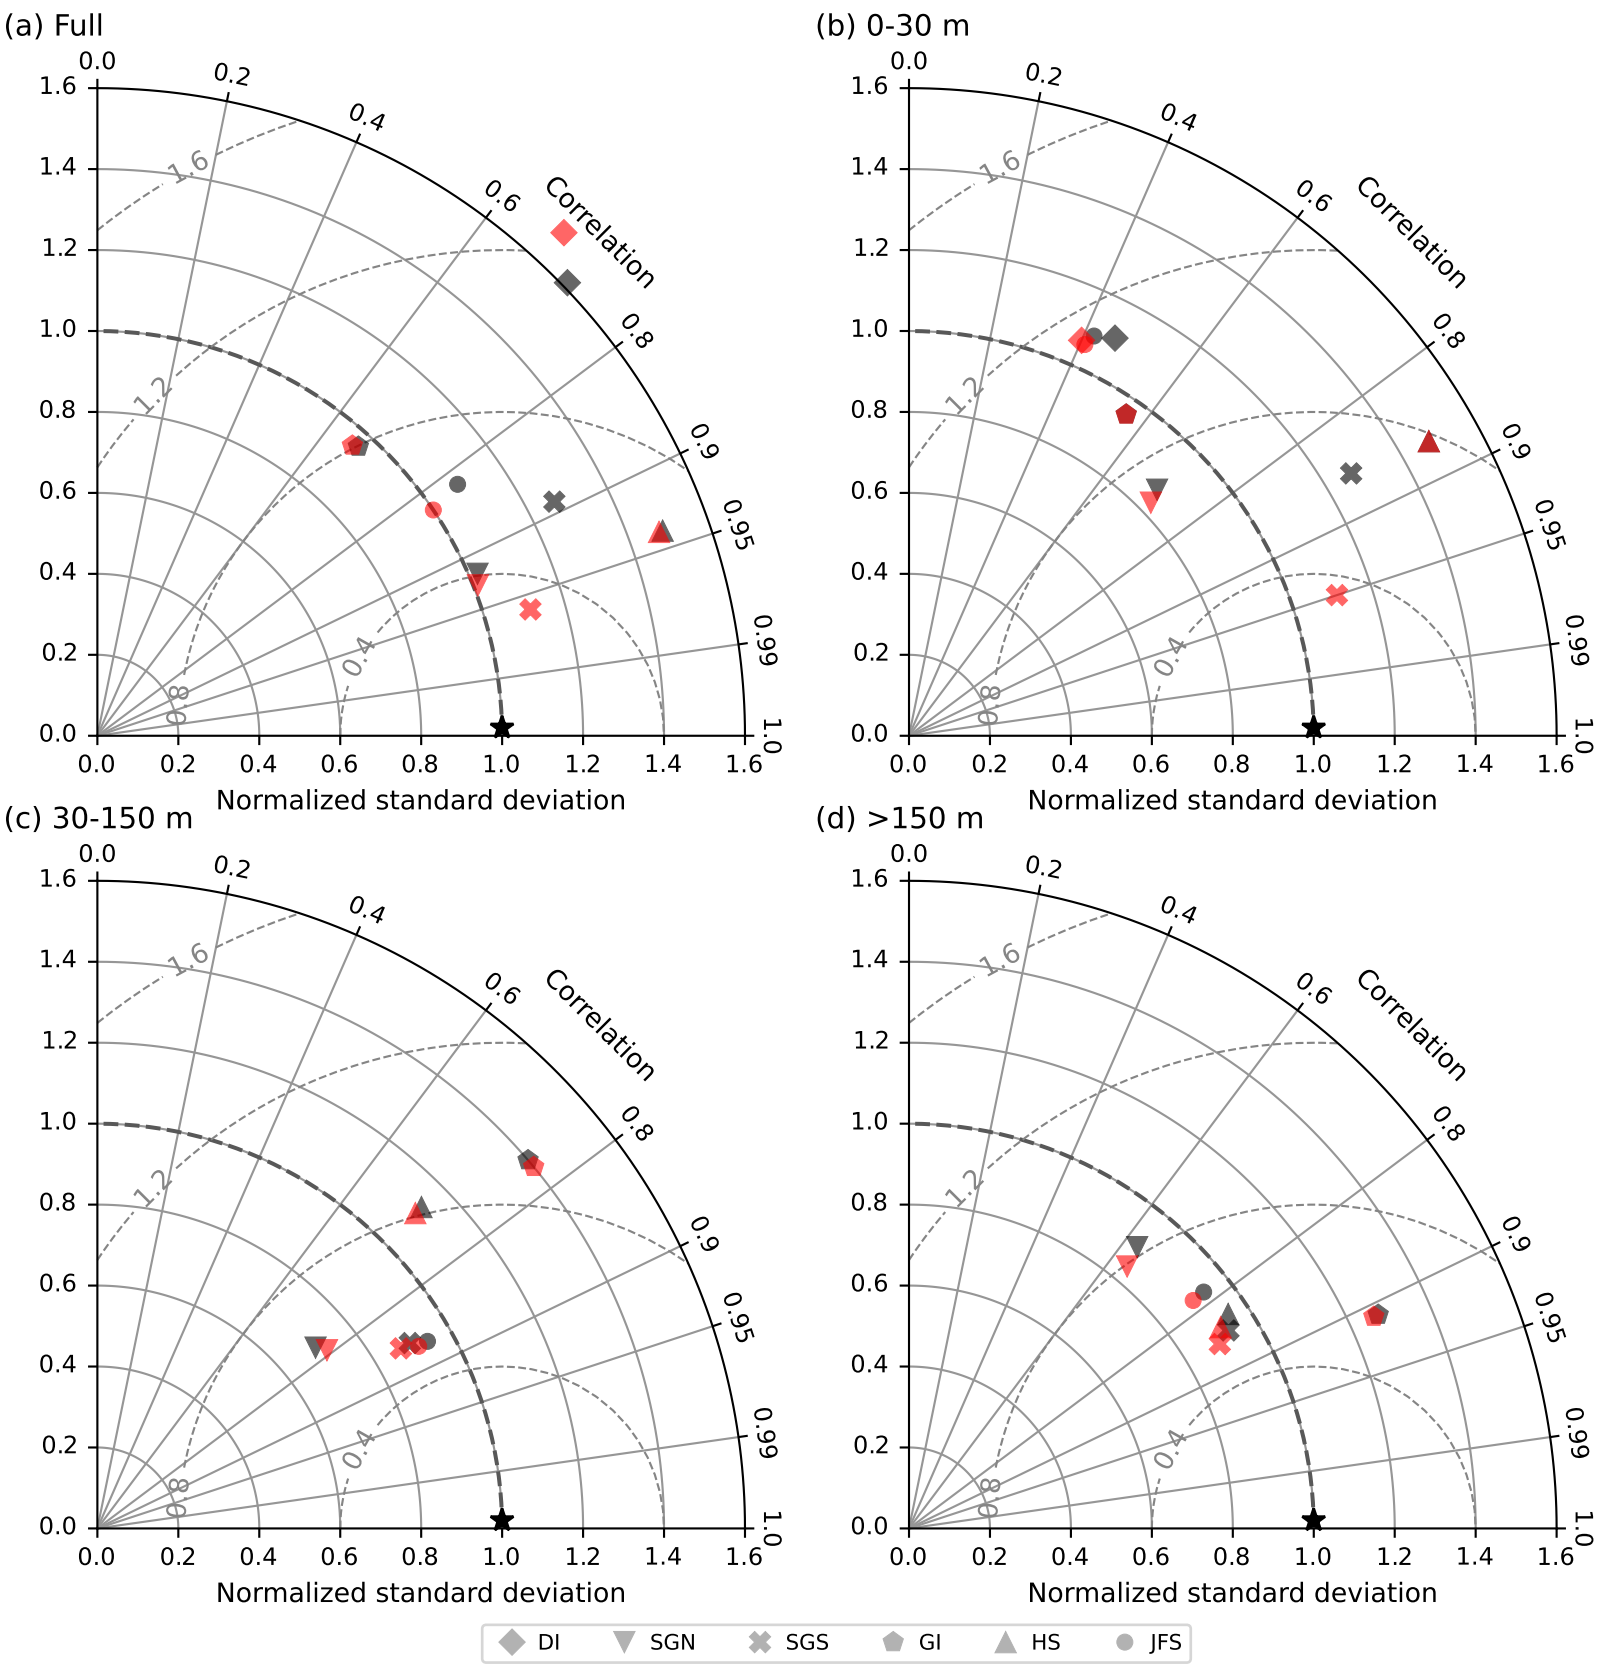

Supplement: Supplementary file 3 [file gmd-2024-58-supplement-version2.zip]
